# Supplementary material for: Prognosis and diagnosis of prostate cancer based on hypergraph regularization sparse least partial squares regression algorithm
Source: publisher site journal article supplement (doi:10.18632/aging.205889), 2024-05-31
Supplement: Supplementary file [file aging-v16i11-205889-supplementary-material-SD2.pdf]

## SUPPLEMENTARY TABLES

**Supplementary Table 1. 31 mRNAs associated with PCa DFS time were obtained from univariate Cox regression analysis.**

| <b>Id</b> | <b>HR</b> | <b>HR.95L</b> | <b>HR.95H</b> | <b>p-value</b> |
|-----------|-----------|---------------|---------------|----------------|
| SYNPO2    | 0.456414  | 0.256276      | 0.812851      | 0.00773        |
| DES       | 0.395982  | 0.175261      | 0.894675      | 0.025908       |
| ZNF185    | 0.345439  | 0.135412      | 0.881221      | 0.026108       |
| RAB9B     | 0.373122  | 0.175214      | 0.794572      | 0.010582       |
| KCNMB1    | 0.388679  | 0.173172      | 0.872373      | 0.021965       |
| FLNA      | 0.465857  | 0.22569       | 0.961598      | 0.038841       |
| ATP2B4    | 0.313308  | 0.125562      | 0.781776      | 0.012859       |
| MYH11     | 0.389088  | 0.190243      | 0.795769      | 0.009717       |
| TLR3      | 0.379091  | 0.146876      | 0.978443      | 0.044962       |
| ACTG2     | 0.348428  | 0.155309      | 0.781682      | 0.010545       |
| DDR2      | 0.353383  | 0.153033      | 0.816031      | 0.014847       |
| FAXDC2    | 0.415565  | 0.179273      | 0.963303      | 0.040646       |
| TGFBR3    | 0.378154  | 0.14801       | 0.966157      | 0.042164       |
| TNS1      | 0.389638  | 0.16841       | 0.901481      | 0.027644       |
| CNN1      | 0.50642   | 0.273275      | 0.938473      | 0.03064        |
| CDC42EP3  | 0.125272  | 0.042677      | 0.367722      | 0.000156       |
| MEIS1     | 0.397359  | 0.167454      | 0.942909      | 0.036323       |
| PRICKLE2  | 0.31801   | 0.121757      | 0.83059       | 0.01934        |
| HSPB8     | 0.451373  | 0.247129      | 0.824418      | 0.009649       |
| AOC3      | 0.421767  | 0.201075      | 0.884681      | 0.022363       |
| ANO6      | 0.381724  | 0.157805      | 0.923377      | 0.032611       |
| GPR161    | 0.345385  | 0.135231      | 0.882127      | 0.026275       |
| MARCKSL1  | 3.150843  | 1.068211      | 9.293867      | 0.037569       |
| LMOD1     | 0.461383  | 0.218824      | 0.972811      | 0.042114       |
| SLC24A3   | 0.354605  | 0.129147      | 0.973657      | 0.044245       |
| MYLK      | 0.415042  | 0.195871      | 0.879453      | 0.021719       |
| CAV2      | 0.409811  | 0.168732      | 0.995336      | 0.048805       |
| C3orf70   | 0.377247  | 0.180398      | 0.788897      | 0.0096         |
| PTGIS     | 0.401191  | 0.204874      | 0.785624      | 0.00773        |
| PDGFC     | 0.385502  | 0.184146      | 0.807034      | 0.011448       |
| PLN       | 0.507888  | 0.284961      | 0.905213      | 0.021579       |

HR, hazard ratio; HR.95L, low 95% CI of HR; HR.95H, high 95% CI of HR.

**Supplementary Table 2. 7 mRNAs were obtained from multivariate Cox regression analysis.**

| <b>Id</b> | <b>coef</b> | <b>HR</b> | <b>HR.95L</b> | <b>HR.95H</b> | <b>p-value</b> |
|-----------|-------------|-----------|---------------|---------------|----------------|
| MYH11     | -3.64818    | 0.026039  | 0.000337      | 2.012673      | 0.100044       |
| ACTG2     | -4.82026    | 0.008065  | 0.000179      | 0.363691      | 0.013122       |
| DDR2      | -2.74029    | 0.064552  | 0.007127      | 0.584631      | 0.014793       |
| CDC42EP3  | -3.48122    | 0.03077   | 0.00387       | 0.244631      | 0.000998       |
| MARCKSL1  | 0.845069    | 2.328138  | 0.703578      | 7.703804      | 0.166321       |
| LMOD1     | 7.614462    | 2027.304  | 38.06145      | 107982.3      | 0.000174       |
| MYLK      | 3.542567    | 34.5555   | 2.447259      | 487.9266      | 0.008729       |

Coef, the coefficient of genes (MYH11, ACTG2, DDR2, CDC42EP3, MARCKSL1, LMOD1 and MYLK) correlated with DFS; HR, hazard ratio; HR.95L, low 95% CI of HR; HR.95H, high 95% CI of HR.
